# Supplementary material
Source: PubMed Central journal article supplement (PMC1253565)
Supplement: pnas_0505521102_1.pdf [file pnas_0505521102_1.pdf]

**Table 1.  $^{15}\text{N}$  chemical shifts of hyperfine signals from wild-type and mutant *Clostridium pasteurianum* rubredoxin (CpRd)**

| Oxidized ( $\text{Fe}^{\text{III}}$ ) proteins |                                      |     |          |         |     |     |     |         |     |
|------------------------------------------------|--------------------------------------|-----|----------|---------|-----|-----|-----|---------|-----|
| CpRd variant                                   | $^{15}\text{N}$ chemical shifts, ppm |     |          |         |     |     |     |         |     |
|                                                | C6/C39                               | T7  | C9/C42   | G10/G43 | Y11 | P40 | L41 | V8      | V44 |
| Wild type                                      | 613/588                              | 358 | -34/-79  | 327/312 | 633 | 407 | 542 | 525     | 346 |
| V44G                                           | 599/573                              | 345 | -53/-94  | 318/286 | 638 | 410 | 560 | 497     | 791 |
| V44A                                           | 604/576                              | 341 | -61/-71  | 318/311 | 664 | 406 | 571 | 517     | 626 |
| V44I                                           | 628/586                              | 368 | -12/-102 | 320/311 | 612 | 414 | 569 | 529     | 453 |
| V44L                                           | 610/592                              | 346 | 3/-147   | 316/304 | 610 | 409 | 534 | 451     | 451 |
| V8G                                            | 627/596                              | 402 | -28/-28  | 333/306 | 818 | 430 | 627 | 766     | 327 |
| V8A                                            | 626/592                              | 360 | 44/-49   | 333/328 | 697 | 414 | 573 | 562     | 368 |
| V8I                                            | 622/598                              | 367 | -35/-83  | 326/314 | 641 | 410 | 545 | 531     | 343 |
| V8L                                            | 622/598                              | 382 | 12/-75   | 333/317 | 647 | 410 | 551 | 511     | 348 |
| V8G/V44G                                       | 625/575                              | 338 | -16/-64  | 321/263 | 733 | 421 | 625 | 703/526 |     |

  

| Reduced ( $\text{Fe}^{\text{II}}$ ) proteins |                                      |     |         |         |     |     |     |         |     |
|----------------------------------------------|--------------------------------------|-----|---------|---------|-----|-----|-----|---------|-----|
| CpRd variant                                 | $^{15}\text{N}$ chemical shifts, ppm |     |         |         |     |     |     |         |     |
|                                              | C6/C39                               | T7  | C9/C42  | G10/G43 | Y11 | P40 | L41 | V8      | V44 |
| Wild type                                    | 322/294                              | 279 | -1/-25  | 223/222 | 394 | 278 | 437 | 498     | 270 |
| V44G                                         | 297/289                              | 272 | -28/-62 | 228/214 | 425 | 279 | 446 | 450     | 482 |
| V44A                                         | 298/277                              | 266 | -30/-30 | 214/214 | 397 | 277 | 466 | 484     | 386 |
| V44I                                         | 324/288                              | 288 | 4/-29   | 229/217 | 370 | 279 | 449 | 511     | 337 |
| V44L                                         | 314/298                              | 310 | 20/-45  | 220/218 | 377 | 281 | 459 | 493     | 327 |
| V8G                                          | 325/297                              | 256 | -20/-48 | 205/204 | 393 | 293 | 516 | 547     | 248 |
| V8A                                          | 320/288                              | 260 | 48/11   | 214/211 | 382 | 282 | 462 | 482     | 243 |
| V8I                                          | 321/296                              | 283 | 0/-25   | 223/220 | 400 | 277 | 433 | 497     | 267 |
| V8L                                          | 316/297                              | 285 | 41/-17  | 221/216 | 397 | 277 | 437 | 487     | 256 |
| V8G/V44G                                     | 304/286                              | 243 | -27/-42 | 207/195 | 406 | 290 | 521 | 448/384 |     |

$^{15}\text{N}$  chemical shifts are at the residue positions specified in the first line for wild-type CpRd.
