# Supplementary material
Source: PubMed Central journal article supplement (PMC1253565)
Supplement: pnas_0505521102_2.pdf [file pnas_0505521102_2.pdf]

**Table 2. Hydrogen bond distances in *Clostridium pasteurianum* rubredoxin (CpRd) variants derived from the <sup>15</sup>N chemical shifts in Table 1 by theoretical Eqs. 1 and 2 (main text)**

Oxidized (Fe<sup>III</sup>) proteins \*

| CpRd variant | Reduction potential, mV (1) | Predicted H <sup>N</sup> ⋯S <sup>Y</sup> bond lengths, Å † |                                    |                                     |                                      |
|--------------|-----------------------------|------------------------------------------------------------|------------------------------------|-------------------------------------|--------------------------------------|
|              |                             | 44 H <sup>N</sup> ⋯S <sup>Y</sup> 42                       | 8 H <sup>N</sup> ⋯S <sup>Y</sup> 6 | 11 H <sup>N</sup> ⋯S <sup>Y</sup> 9 | 41 H <sup>N</sup> ⋯S <sup>Y</sup> 39 |
| V44G         | 0                           | 2.40                                                       | 2.71                               | 2.57                                | 2.65                                 |
| V44A         | -24                         | 2.58                                                       | 2.69                               | 2.54                                | 2.63                                 |
| V44I         | -53                         | 2.76                                                       | 2.68                               | 2.59                                | 2.64                                 |
| Wild type    | -77                         | 2.87                                                       | 2.68                               | 2.57                                | 2.67                                 |
| V44L         | -87                         | 2.76                                                       | 2.76                               | 2.60                                | 2.68                                 |
| V8G          | -7                          | 2.89                                                       | 2.42                               | 2.38                                | 2.58                                 |
| V8A          | -44                         | 2.85                                                       | 2.65                               | 2.51                                | 2.64                                 |
| Wt           | -77                         | 2.87                                                       | 2.68                               | 2.57                                | 2.67                                 |
| V8I          | -81                         | 2.87                                                       | 2.68                               | 2.56                                | 2.66                                 |
| V8L          | -82                         | 2.87                                                       | 2.70                               | 2.56                                | 2.66                                 |
| V8G/V44G     | +39                         | 2.67/2.49                                                  |                                    | 2.47                                | 2.58                                 |

Reduced (Fe<sup>II</sup>) proteins †

| CpRd variant | Reduction potential, mV (1) | Predicted H <sup>N</sup> ⋯S <sup>Y</sup> bond lengths, Å † |                                    |                                     |                                      |
|--------------|-----------------------------|------------------------------------------------------------|------------------------------------|-------------------------------------|--------------------------------------|
|              |                             | 44 H <sup>N</sup> ⋯S <sup>Y</sup> 42                       | 8 H <sup>N</sup> ⋯S <sup>Y</sup> 6 | 11 H <sup>N</sup> ⋯S <sup>Y</sup> 9 | 41 H <sup>N</sup> ⋯S <sup>Y</sup> 39 |
| V44G         | 0                           | 2.21                                                       | 2.32                               | 2.39                                | 2.33                                 |
| V44A         | -24                         | 2.50                                                       | 2.23                               | 2.46                                | 2.28                                 |
| V44I         | -53                         | 2.62                                                       | 2.16                               | 2.53                                | 2.33                                 |
| Wild type    | -77                         | 2.80                                                       | 2.20                               | 2.47                                | 2.36                                 |
| V44L         | -87                         | 2.65                                                       | 2.21                               | 2.52                                | 2.30                                 |
| V8G          | -7                          | 2.85                                                       | 2.04                               | 2.47                                | 2.15                                 |
| V8A          | -44                         | 2.87                                                       | 2.24                               | 2.50                                | 2.29                                 |
| Wt           | -77                         | 2.80                                                       | 2.20                               | 2.47                                | 2.36                                 |
| V8I          | -81                         | 2.80                                                       | 2.20                               | 2.45                                | 2.37                                 |
| V8L          | -82                         | 2.83                                                       | 2.23                               | 2.46                                | 2.36                                 |
| V8G/V44G     | +39                         | 2.47/2.30                                                  |                                    | 2.44                                | 2.14                                 |

\*Fermi contact spin densities were calculated as a function of the H–S distance for the oxidized and reduced models described in the main text. These values were converted to hyperfine shifts by multiplication with  $2.6743 \times 10^5$  for oxidized CpRd and  $2.2923 \times 10^5$  for reduced CpRd (2). The relationship between the hyperfine shifts and the H–S distance was investigated by linear regression analysis. The values obtained for the oxidized model were indistinguishable from those reported in ref. 2. In the notation used, 44 H<sup>N</sup>⋯S<sup>Y</sup> 42 denotes the H<sup>N</sup> of residue 44 H-bonded to the S<sup>Y</sup> of residue 42.

†No high-resolution x-ray structure is available for reduced CpRd that could be used to compare model distances with theoretical values in the reduced state.

1. Xiao, Z., Maher, M. J., Cross, M., Bond, C. S., Guss, J. M. & Wedd, A. G. (2000) *J. Biol. Inorg. Chem.* **5**, 75–84.
2. Wilkens, S. J., Xia, B., Weinhold, F., Markley, J. L. & Westler, W. M. (1998) *J. Am. Chem. Soc.* **120**, 4806–4814.
